# Supplementary material for: Regulating Conflicts of Interest in Medicine Through Public Disclosure: Evidence from a Physician Payments Sunshine Law
Source: Atypon-hosted journal article supplement (doi:10.1287/mnsc.2020.3940), 2021-04-09
Supplement: mnsc.2020.3940.sm1.pdf [file mnsc.2020.3940.sm1.pdf]

**Appendix**  
 Regulating Conflicts of Interest through Public Disclosure:  
 Evidence from a Physician Payments Sunshine Law

This document provides additional details, figures, tables, and robustness checks.

Table of Contents:

| Label            | Description                                                             | Page # |
|------------------|-------------------------------------------------------------------------|--------|
| <b>Figure A1</b> | Table summary of data components and data exclusions                    | 2      |
| <b>Figure A2</b> | Extrapolating results of model (5)                                      | 3      |
| <b>Table A1</b>  | Robustness – alternative standard error specifications                  | 4      |
| <b>Table A2</b>  | Robustness – effects when excluding each drug class in turn             | 5      |
| <b>Table A3</b>  | Robustness – excluding each counterfactual state in turn                | 6      |
| <b>Table A4</b>  | Robustness – excluding Partners Healthcare physicians                   | 6      |
| <b>Table A5</b>  | Robustness – only using drugs present in both batches of data           | 7      |
| <b>Table A6</b>  | Robustness – using all drugs from these classes                         | 7      |
| <b>Table A7</b>  | Robustness – using Ln(Rx) and Ln(Rx+1)                                  | 8      |
| <b>Table A8</b>  | Robustness – only regressing on branded drugs                           | 8      |
| <b>Table A9</b>  | Robustness – collapsing at the doctor-drug-branded level (OLS, Poisson) | 9      |
| <b>Table A10</b> | Robustness – excluding top-5 or non-top-5 branded drugs                 | 10     |
| <b>Table A11</b> | Robustness – psych vs. non-psych drugs                                  | 10     |
| <b>Table A12</b> | Robustness – dropping rarely prescribed doctor-drug pairs               | 11     |
| <b>Table A13</b> | Robustness – volume quintiles                                           | 12     |
| <b>Table A14</b> | Robustness – volume quintiles dropping rare doctor-drug pairs           | 13     |
| <b>Table A15</b> | Robustness – volume quintiles, dropping rare doctor-drugs, Ln(Rx+1)     | 14     |
| <b>Table A16</b> | Robustness – controlling for other AMC-level policies on marketing      | 15     |
| <b>Table A17</b> | List of AMC-level policy implementation dates (used in Table A16)       | 15     |
| <b>Table A18</b> | Raw data summary – only those drugs present in all 48 months            | 16     |
| <b>Table A19</b> | Raw data summary – excluding all observations with Rx = 0               | 16     |
| <b>Table A20</b> | Raw data summary – excluding all rare doctor-drugs (as in Table A12)    | 16     |
| <b>Table A21</b> | Robustness – splitting by both prescribing volume and drug sales force  | 17     |
| <b>Table A22</b> | List of all drugs included in the main dataset                          | 18-20  |

**Figure A1. Data Summary and Data Exclusions**

| Data Type:               | Data Included:                                                                                                                                          | Data Selection Based on:                                                        | Data Exclusions:                                                                                                                                                                            |
|--------------------------|---------------------------------------------------------------------------------------------------------------------------------------------------------|---------------------------------------------------------------------------------|---------------------------------------------------------------------------------------------------------------------------------------------------------------------------------------------|
| Geographic Regions       | 1) Chi, IL<br>2) Bos, MA<br>3) Phi, PA and Pit, PA<br>4) NYC, NY<br>5) Northern CA (Bay Area) and Southern CA (LA, SD areas)                            | 1. Regions with the most academic medical centers (AMCs)                        |                                                                                                                                                                                             |
| Academic Medical Centers | 23 AMCs in the above geographic regions                                                                                                                 | 1. IMS AMC-hospital affiliations database                                       | 1. Hospitals not owned or operated by an AMC, with a few exceptions (e.g. Partners Healthcare, NY Presbyterian) that have full-time attendings affiliated with one of several possible AMCs |
| Drugs                    | 262 drugs in nine drug classes                                                                                                                          | 1. IMS drug classifications<br>2. Physician feedback on commonly marketed drugs | 1. Rarely prescribed drugs (according to IMS)<br>2. Branded drugs that had a generic version come on the market during 2007-2011<br>3. Generics that entered the market during 2007-2011    |
| Physicians               | 5,730 physicians listed as an attending at one of these AMCs in at least one quarter during the pre-policy period of January 2006 – June 2009           | 1. Quarterly IMS affiliations database                                          | 1. Physicians that had multiple affiliations in the pre-policy period, according to IMS                                                                                                     |
| Monthly Prescriptions    | Monthly prescriptions from July 2007 – July 2011 for each physician-month                                                                               | 1. 24 months before and after the policy                                        | 1. Prescriptions for physicians that did not prescribe a minimum amount of an entire drug class                                                                                             |
| Measures of Marketing    | (1) Whether a drug is branded with no generic on the market (for a given month)<br>(2) National sales force size in Q2 of 2009, according to SDI Health | 1. FDA drug databases<br>2. When a generic is first prescribed in the IMS data  |                                                                                                                                                                                             |
| Payments to Physicians   | All meals and consulting payments of \$50+ to MA-licensed physicians from July 2009 – December 2011                                                     | 1. Disclosures collected via the Massachusetts Sunshine Law                     | 1. Other types of payments (e.g. educational)                                                                                                                                               |

### **Figure A2. Calculations, Extrapolating Results in Model (5)**

As noted in model (5), disclosure led to a net decrease of 0.140 prescriptions per doctor-month-drug observation for branded drugs in Massachusetts. Since there are 1,775,890 physician-drug-month observations in Massachusetts post-disclosure, this translates to an estimated decrease of:

$$0.140 \text{ per doctor-drug-month} * 1,775,890 \text{ doctor-drug-months} = 248,625 \text{ total branded prescriptions}$$

This is relative to 972,275 total branded drug prescriptions actually written in Massachusetts during this time. This yields a predicted decrease of:

$$248,625 / (248,625 + 972,275) = 0.20 \rightarrow 20\% \text{ decrease in branded drugs}$$

Relative to the 3,625,380 total prescriptions written in Massachusetts post-disclosure (in this data), this represents a decrease in total prescriptions of:

$$248,625 / (248,625 + 3,625,380) = 0.064 \rightarrow 6.4\% \text{ decrease in total prescriptions}$$

**Table A1: Alternate SE Specifications**

|                                            | <b>(A1)</b>                   | <b>(A2)</b>               | <b>(A3)</b>                        |
|--------------------------------------------|-------------------------------|---------------------------|------------------------------------|
| <b>DV</b>                                  | <b>Rx</b>                     | <b>Rx</b>                 | <b>Rx</b>                          |
| <b>N (physician-drug-month)</b>            | <b>17,013,810</b>             | <b>17,013,810</b>         | <b>17,013,810</b>                  |
| <b>SEs</b>                                 | <b>Clustered by Physician</b> | <b>Clustered by State</b> | <b>Bootstrapped (AMC Clusters)</b> |
| <b>Adj. R<sup>2</sup></b>                  | <b>0.874</b>                  | <b>0.874</b>              | <b>0.874</b>                       |
| <i>Policies</i>                            |                               |                           |                                    |
| 1. Sunshine                                | 0.041<br>(0.028)              | 0.041<br>(0.034)          | 0.041<br>(0.041)                   |
| <i>Interactions</i>                        |                               |                           |                                    |
| 2. Sunshine*Branded                        | -0.181***<br>(0.017)          | -0.181***<br>(0.000)      | -0.181***<br>(0.030)               |
| <i>Controls</i>                            |                               |                           |                                    |
| Month FE                                   | YES                           | YES                       | YES                                |
| Physician*Drug FE                          | YES                           | YES                       | YES                                |
| <i>Linear combinations of coefficients</i> |                               |                           |                                    |
| a.) 1 + 2                                  | -0.140***<br>(0.021)          | -0.140***<br>(0.034)      | -0.140***<br>(0.042)               |

\*\*\*p<0.01.

SEs in (A1) and (A2) are robust.

Bootstrap in (A3) is with 100 reps and a seed of 100 in Stata.

For comparison, the average branded Rx in MA, post-policy, was 0.547 in all specifications.

**Table A2: Excluding Drug Classes, Part 1**

|                                 | (A4)                    | (A5)                     | (A6)                   | (A7)                 | (A8)                 |
|---------------------------------|-------------------------|--------------------------|------------------------|----------------------|----------------------|
| <b>DV</b>                       | <b>Rx</b>               | <b>Rx</b>                | <b>Rx</b>              | <b>Rx</b>            | <b>Rx</b>            |
| <b>N (physician-drug-month)</b> | <b>13,534,864</b>       | <b>16,554,960</b>        | <b>15,910,300</b>      | <b>14,998,402</b>    | <b>16,841,946</b>    |
| <b>Drug Class Excluded</b>      | <b>Anti-depressants</b> | <b>Anti-hyperactives</b> | <b>Anti-psychotics</b> | <b>Anxiolytics</b>   | <b>Sleep Aids</b>    |
| <b>Adj-R<sup>2</sup></b>        | <b>0.879</b>            | <b>0.876</b>             | <b>0.872</b>           | <b>0.874</b>         | <b>0.874</b>         |
| <i>Policies</i>                 |                         |                          |                        |                      |                      |
| 1. Sunshine Implemented         | 0.024<br>(0.038)        | 0.047<br>(0.037)         | 0.042<br>(0.040)       | 0.092**<br>(0.042)   | 0.039<br>(0.037)     |
| <i>Interactions</i>             |                         |                          |                        |                      |                      |
| 2. Sunshine*Branded             | -0.174***<br>(0.024)    | -0.188***<br>(0.023)     | -0.187***<br>(0.022)   | -0.244***<br>(0.035) | -0.181***<br>(0.025) |
| <i>Controls</i>                 |                         |                          |                        |                      |                      |
| Month FE                        | YES                     | YES                      | YES                    | YES                  | YES                  |
| Physician*Drug FE               | YES                     | YES                      | YES                    | YES                  | YES                  |
| <i>Linear Comb. of Coeff.</i>   |                         |                          |                        |                      |                      |
| a.) 1 + 2                       | -0.150***<br>(0.040)    | -0.142***<br>(0.040)     | -0.145***<br>(0.040)   | -0.152***<br>(0.041) | -0.142***<br>(0.038) |

\*\* p<0.05; \*\*\* p<0.01.

SEs are robust and clustered by AMC.

For comparison, the average branded Rx in MA post-policy was 0.551, 0.532, 0.506, 0.548, and 0.550 respectively.

**Table A2: Excluding Drug Classes, Part 2**

|                                 | (A9)                 | (A10)                     | (A11)                         | (A12)                |
|---------------------------------|----------------------|---------------------------|-------------------------------|----------------------|
| <b>DV</b>                       | <b>Rx</b>            | <b>Rx</b>                 | <b>Rx</b>                     | <b>Rx</b>            |
| <b>N (physician-drug-month)</b> | <b>16,192,308</b>    | <b>11,278,353</b>         | <b>16,394,451</b>             | <b>14,404,896</b>    |
| <b>Drug Classes Excluded</b>    | <b>Statins</b>       | <b>Anti-hypertensives</b> | <b>Proton Pump Inhibitors</b> | <b>Diabetes</b>      |
| <b>Adj-R<sup>2</sup></b>        | <b>0.874</b>         | <b>0.857</b>              | <b>0.877</b>                  | <b>0.877</b>         |
| <i>Policies</i>                 |                      |                           |                               |                      |
| 1. Sunshine Implemented         | 0.035<br>(0.035)     | 0.067<br>(0.045)          | 0.007<br>(0.035)              | 0.029<br>(0.038)     |
| <i>Interactions</i>             |                      |                           |                               |                      |
| 2. Sunshine*Branded             | -0.130***<br>(0.017) | -0.238***<br>(0.042)      | -0.123<br>(0.020)             | -0.186***<br>(0.027) |
| <i>Controls</i>                 |                      |                           |                               |                      |
| Month FE                        | YES                  | YES                       | YES                           | YES                  |
| Physician*Drug FE               | YES                  | YES                       | YES                           | YES                  |
| <i>Linear Comb. of Coeff.</i>   |                      |                           |                               |                      |
| a.) 1 + 2                       | -0.095***<br>(0.034) | -0.171***<br>(0.056)      | -0.116**<br>(0.043)           | -0.157***<br>(0.049) |

\*\* p<0.05; \*\*\* p<0.01.

SEs are robust and clustered by AMC.

For comparison, the average branded Rx in MA, post-policy, was 0.428, 0.670, 0.559, and 0.618 respectively.

**Table A3: Excluding States**

|                                     | (A13)                | (A14)                | (A15)                | (A16)                |
|-------------------------------------|----------------------|----------------------|----------------------|----------------------|
| <b>DV</b>                           | <b>Rx</b>            | <b>Rx</b>            | <b>Rx</b>            | <b>Rx</b>            |
| <b>N (physician-drug-month)</b>     | <b>13,440,071</b>    | <b>16,054,605</b>    | <b>15,807,506</b>    | <b>14,825,430</b>    |
| <b>Excluded State</b>               | <b>CA</b>            | <b>IL</b>            | <b>NY</b>            | <b>PA</b>            |
| <b>Adj-R<sup>2</sup></b>            | <b>0.882</b>         | <b>0.875</b>         | <b>0.881</b>         | <b>0.868</b>         |
| <i>Policies</i>                     |                      |                      |                      |                      |
| 1. Sunshine Implemented             | 0.006<br>(0.044)     | 0.034<br>(0.039)     | 0.066<br>(0.037)     | 0.051<br>(0.041)     |
| <i>Interactions</i>                 |                      |                      |                      |                      |
| 2. Sunshine*Branded                 | -0.181***<br>(0.025) | -0.181***<br>(0.025) | -0.181***<br>(0.025) | -0.181***<br>(0.025) |
| <i>Controls</i>                     |                      |                      |                      |                      |
| Month FE                            | YES                  | YES                  | YES                  | YES                  |
| Physician*Drug FE                   | YES                  | YES                  | YES                  | YES                  |
| <i>Linear Comb. of Coefficients</i> |                      |                      |                      |                      |
| a.) 1 + 2                           | -0.175***<br>(0.047) | -0.148***<br>(0.043) | -0.115***<br>(0.041) | -0.139***<br>(0.045) |

\*\*\*p<0.01.

SEs are robust and clustered by AMC.

For comparison, the average branded Rx in MA, post-policy, was 0.547.

**Table A4: Excluding Partners Healthcare Physicians**

|                                     | (A17)                |
|-------------------------------------|----------------------|
| <b>N (physician-drug-month)</b>     | <b>14,244,774</b>    |
| <b>Adj. R<sup>2</sup></b>           | <b>0.874</b>         |
| <i>Policies</i>                     |                      |
| 1. Sunshine                         | 0.058<br>(0.040)     |
| <i>Interactions</i>                 |                      |
| 2. Sunshine*Branded                 | -0.203***<br>(0.022) |
| <i>Controls</i>                     |                      |
| Month FE                            | YES                  |
| Physician*Drug FE                   | YES                  |
| <i>Linear combinations of coeff</i> |                      |
| a.) 1 + 2                           | -0.145***<br>(0.041) |

\*\*\*p<0.01.

SEs are robust and clustered by AMC.

For comparison, the average branded Rx in MA, post-policy, was 0.566.

**Table A5: Only Including Drugs with 48 Months of Data**

|                                     | (A18)                |
|-------------------------------------|----------------------|
| <b>DV</b>                           | <b>Rx</b>            |
| <b>N (physician-drug-month)</b>     | <b>8,609,328</b>     |
| <b>Drugs</b>                        | <b>81</b>            |
| <b>Adj. R<sup>2</sup></b>           | <b>0.878</b>         |
| <i>Policies</i>                     |                      |
| 1. Sunshine                         | 0.029<br>(0.039)     |
| <i>Interactions</i>                 |                      |
| 2. Sunshine*Branded                 | -0.221***<br>(0.032) |
| <i>Controls</i>                     |                      |
| Month FE                            | YES                  |
| Physician*Drug FE                   | YES                  |
| <i>Linear combinations of coeff</i> |                      |
| a.) 1 + 2                           | -0.192***<br>(0.050) |

\*\*\*p<0.01.

SEs are robust and clustered by AMC.

For comparison, the average branded Rx in MA, post-policy, was 0.959.

**Table A6: Including All Drugs**

|                                            | (A19)                |
|--------------------------------------------|----------------------|
| <b>DV</b>                                  | <b>Rx</b>            |
| <b>N (physician-drug-month)</b>            | <b>22,769,044</b>    |
| <b>Drugs</b>                               | <b>343</b>           |
| <b>Adj-R<sup>2</sup></b>                   | <b>0.860</b>         |
| <i>Policies</i>                            |                      |
| 1. Sunshine (Implementation)               | 0.178***<br>(0.053)  |
| <i>Interactions</i>                        |                      |
| 3. Sunshine*Branded                        | -0.396***<br>(0.094) |
| <i>Controls</i>                            |                      |
| Month FE                                   | YES                  |
| Physician*Drug FE                          | YES                  |
| <i>Linear Combinations of Coefficients</i> |                      |
| a.) 1 + 3                                  | -0.218***<br>(0.057) |

\*\*\* p<0.01.

SEs are robust and clustered by AMC.

For comparison, the average branded Rx in MA, post-policy, was 0.454.

Note: This regression includes all drugs that were dropped per the methods detailed in the “data exclusions” section.

**Table A7: Ln(Rx) Specifications**

|                                     | (A20)                | (A21)                |
|-------------------------------------|----------------------|----------------------|
| <b>N (physician-drug-month)</b>     | <b>17,013,810</b>    | <b>17,013,810</b>    |
| <b>Dependent Variable</b>           | <b>Ln(Rx)^</b>       | <b>Ln(Rx+1)</b>      |
| <b>Adj. R<sup>2</sup></b>           | <b>0.803</b>         | <b>0.803</b>         |
| <i>Policies</i>                     |                      |                      |
| 1. Sunshine                         | 0.002<br>(0.007)     | -0.001<br>(0.009)    |
| <i>Interactions</i>                 |                      |                      |
| 2. Sunshine*Branded                 | -0.016***<br>(0.002) | -0.014***<br>(0.002) |
| <i>Controls</i>                     |                      |                      |
| Month FE                            | YES                  | YES                  |
| Physician*Drug FE                   | YES                  | YES                  |
| <i>Linear combinations of coeff</i> |                      |                      |
| a.) 1 + 2 <sup>#</sup>              | -0.014**<br>(0.006)  | -0.014*<br>(0.007)   |

\*p<0.10, \*\*p<0.05, \*\*\*p<0.01. SEs are robust and clustered by AMC.

^DV = 0 for observations with 0 prescriptions.

<sup>#</sup>The p-value is 0.024 in Model (A20) and 0.059 in Model (A21).

For comparison, the average branded log-Rx in MA, post-policy, was 0.116 and 0.159, respectively.

**Table A8: Branded Only (No Generics)**

|                                 | (A22)               |
|---------------------------------|---------------------|
| <b>N (physician-drug-month)</b> | <b>6,744,556</b>    |
| <b>Dependent Variable</b>       | <b>Rx</b>           |
| <b>Adj. R<sup>2</sup></b>       | <b>0.842</b>        |
| <i>Policies</i>                 |                     |
| 1. Sunshine                     | -0.088**<br>(0.042) |
| Month FE                        | YES                 |
| Physician*Drug FE               | YES                 |

\*\*p<0.05

SEs are robust and clustered by AMC.

This regresses only on branded drugs to test whether the generic counterfactual is crucial to the result.

For comparison, the average branded Rx in MA, post-policy, was 0.547.

**Table A9: Aggregating Rx Across Drugs**

|                                     | (A23)                       | (A24)                       |
|-------------------------------------|-----------------------------|-----------------------------|
| DV <sup>^</sup>                     | Rx per Doctor-Branded-Month | Rx per Doctor-Branded-Month |
| Specification                       | OLS                         | Poisson                     |
| N <sup>#</sup>                      | 543,310                     | 542,894                     |
| Adj. R <sup>2</sup>                 | 0.747                       | -                           |
| <i>Main Effects</i>                 |                             |                             |
| 1. Sunshine                         | 6.487*<br>(3.214)           | 0.051**<br>(0.026)          |
| 2. Branded                          | -11.478***<br>(3.351)       | -0.623***<br>(0.020)        |
| <i>Interactions</i>                 |                             |                             |
| 3. Sunshine*Branded                 | -13.324**<br>(5.631)        | -0.383***<br>(0.023)        |
| <i>Controls</i>                     |                             |                             |
| Month FE                            | YES                         | YES                         |
| Physician FE                        | YES                         | YES                         |
| <i>Linear combinations of coeff</i> |                             |                             |
| a.) 1 + 3                           | -6.837**<br>(2.655)         | -                           |

\*p<0.10, \*\*p<0.05, \*\*\*p<0.01.

SEs are robust and clustered by AMC.

<sup>^</sup>The DV is the aggregated prescriptions at the doctor – month level, split by branded and generic drugs (i.e. two observations per doctor – month).

<sup>#</sup>Observations are very slightly different between specifications because 17 physicians (9 treatment, 8 control) had no changes in prescriptions over time because they prescribed only drugs from these classes that were excluded in the sample, and thus were excluded in the Poisson model.

For comparison, the average branded Rx in MA, post-policy, was 14.043.

**Table A10: Top 5 Drug Regressions**

|                                           | (A25)                                 | (A26)                                               |
|-------------------------------------------|---------------------------------------|-----------------------------------------------------|
| <b>N (physician-drug-month)<br/>Drugs</b> | <b>16,510,050</b>                     | <b>10,773,014</b>                                   |
| <b>Adj. R<sup>2</sup></b>                 | <b>No Top-5<br/>Branded<br/>0.873</b> | <b>Only Top-5<br/>Branded<sup>^</sup><br/>0.885</b> |
| <i>Policies</i>                           |                                       |                                                     |
| 1. Sunshine                               | 0.031<br>(0.038)                      | 0.015<br>(0.040)                                    |
| <i>Interactions</i>                       |                                       |                                                     |
| 2. Sunshine*Branded                       | -0.104***<br>(0.020)                  | -0.842***<br>(0.218)                                |
| <i>Controls</i>                           |                                       |                                                     |
| Month FE                                  | YES                                   | YES                                                 |
| Physician*Drug FE                         | YES                                   | YES                                                 |
| <i>Linear combinations of coeff</i>       |                                       |                                                     |
| a.) 1 + 2                                 | -0.074**<br>(0.031)                   | -0.827***<br>(0.233)                                |

\*\*p<0.05, \*\*\*p<0.01.

SEs are robust and clustered by AMC.

<sup>^</sup>This excludes all branded drugs except the top-5.

For comparison, the average branded Rx in MA, post-policy, was 0.325 and 3.285, respectively.

**Table A11: Psych and Non-Psych**

|                                           | (A27)                          | (A28)                      |
|-------------------------------------------|--------------------------------|----------------------------|
| <b>N (physician-drug-month)<br/>Drugs</b> | <b>12,792,171</b>              | <b>4,221,639</b>           |
| <b>Adj. R<sup>2</sup></b>                 | <b>Psych<br/>0.883</b>         | <b>Non-Psych<br/>0.850</b> |
| <i>Policies</i>                           |                                |                            |
| 1. Sunshine                               | -0.020<br>(0.034)              | 0.348***<br>(0.118)        |
| <i>Interactions</i>                       |                                |                            |
| 2. Sunshine*Branded                       | -0.042**<br>(0.016)            | -0.607***<br>(0.131)       |
| <i>Controls</i>                           |                                |                            |
| Month FE                                  | YES                            | YES                        |
| Physician*Drug FE                         | YES                            | YES                        |
| <i>Linear combinations of coeff</i>       |                                |                            |
| a.) 1 + 2                                 | -0.063 <sup>^</sup><br>(0.036) | -0.259***<br>(0.061)       |

\*\*p<0.05, \*\*\*p<0.01.

<sup>^</sup>p = 0.107.

SEs are robust and clustered by AMC.

For comparison, the average branded Rx in MA, post-policy, was 0.679 and 0.476, respectively.

**Table A12: Dropping Rare Doctor-Drug Combinations**

|                                            | (A29)                | (A30)                |
|--------------------------------------------|----------------------|----------------------|
| <b>DV</b>                                  | <b>Rx</b>            | <b>Ln(Rx+1)</b>      |
| <b>N (physician-drug-month)</b>            | <b>1,034,797</b>     | <b>1,034,797</b>     |
| <b>Adj-R<sup>2</sup></b>                   | <b>0.847</b>         | <b>0.647</b>         |
| 1.Sunshine Implemented                     | -0.092<br>(0.275)    | -0.046<br>(0.037)    |
| 2. Sunshine*Branded                        | -1.493***<br>(0.229) | -0.080***<br>(0.019) |
| <i>Controls</i>                            |                      |                      |
| Month FE                                   | YES                  | YES                  |
| Physician*Drug FE                          | YES                  | YES                  |
| <i>Linear Combinations of Coefficients</i> |                      |                      |
| a.) 1 + 2                                  | -1.585***<br>(0.360) | -0.126***<br>(0.043) |

\*\*\* p<0.01. SEs are robust and clustered by AMC.

Linear combination (a) represents the net effect of disclosure on *branded drugs*.

For comparison, the average branded Rx in MA, post-policy, was 7.374 and 1.681, respectively.

These specifications exclude all doctor-drug pairs with **less than 48 total scripts in the dataset** (this translates to less than 1 script per month on average). This yields 5001 remaining physicians and 179 drugs (and 37,281 unique doctor-drug combinations).

For Model (A29), the extrapolated effect size can be approximated as  $1.585 \div (1.585 + 7.374) = 17.7\%$ .

By comparing Model (A30) to Model (A21), this implies the  $\ln(\text{Rx}+1)$  dependent variable is highly sensitive to the zeroes from these rare doctor-drug observations. Thus these should be viewed as conservative robustness checks. This makes sense when considering that the  $\ln(\text{Rx}+1)$  DV likely underestimates policy effects on more highly prescribed drugs and higher-prescribing doctors; these are the very observations where marketing and thus disclosure are most likely to have true effects.

**Table A13: Splitting Effects by Volume Quintiles, DV = Rx**

|                                 | (A31)                | (A32)                 | (A33)                 | (A34)                 | (A35)                |
|---------------------------------|----------------------|-----------------------|-----------------------|-----------------------|----------------------|
| <b>N (physician-drug-month)</b> | <b>6,235,343</b>     | <b>4,381,007</b>      | <b>2,918,677</b>      | <b>1,988,417</b>      | <b>1,490,366</b>     |
| <b>Volume Quintile</b>          | <b>Top</b>           | <b>2<sup>nd</sup></b> | <b>3<sup>rd</sup></b> | <b>4<sup>th</sup></b> | <b>Bottom</b>        |
| <b>Dependent Variable</b>       | <b>Rx</b>            | <b>Rx</b>             | <b>Rx</b>             | <b>Rx</b>             | <b>Rx</b>            |
| <b>Adj-R<sup>2</sup></b>        | <b>0.898</b>         | <b>0.651</b>          | <b>0.502</b>          | <b>0.397</b>          | <b>0.364</b>         |
| <i>Main Effects</i>             |                      |                       |                       |                       |                      |
| 1. Sunshine Implementation      | 0.063<br>(0.077)     | 0.058<br>(0.044)      | 0.072*<br>(0.039)     | 0.015<br>(0.041)      | 0.036<br>(0.049)     |
| <i>Interactions</i>             |                      |                       |                       |                       |                      |
| 2. Sunshine*Branded             | -0.240***<br>(0.051) | -0.162***<br>(0.013)  | -0.125***<br>(0.024)  | -0.085*<br>(0.043)    | -0.061<br>(0.098)    |
| Month FE                        | YES                  | YES                   | YES                   | YES                   | YES                  |
| Physician*Drug FE               | YES                  | YES                   | YES                   | YES                   | YES                  |
| <i>Linear Comb. of Coeff.</i>   |                      |                       |                       |                       |                      |
| a.) 1 + 2                       | -0.177**<br>(0.083)  | -0.104**<br>(0.046)   | -0.053*<br>(0.030)    | -0.070**<br>(0.027)   | -0.025***<br>(0.064) |

\*\*\* p<0.01. SEs are robust and clustered by AMC.

The *Branded* indicator is dropped for being collinear to drug FE.

Linear combination (a) represents the net effect of *sunshine-implementation* on *branded drugs*.

**Table A13b: Summary Stats for Table A13**

| <b>Volume Quintile</b>                              | <b>Top</b>       | <b>2<sup>nd</sup></b> | <b>3<sup>rd</sup></b> | <b>4<sup>th</sup></b> | <b>Bottom</b>    |
|-----------------------------------------------------|------------------|-----------------------|-----------------------|-----------------------|------------------|
| Total physicians                                    | 1146             | 1146                  | 1146                  | 1146                  | 1146             |
| Total branded scripts in MA,<br>post-policy average | 0.911<br>(4.037) | 0.320<br>(1.570)      | 0.200<br>(1.156)      | 0.140<br>(0.776)      | 0.211<br>(1.338) |
| Obs, MA post-policy                                 | 801,738          | 457,651               | 247,188               | 153,278               | 115,035          |
| Extrapolated effect size                            | 16%              | 25%                   | 21%                   | 33%                   | 11%              |
| Extrapolated scripts reduced                        | 872,290          | 194,044               | 62,538                | 32,188                | 27,148           |

This extrapolates to an estimated decrease of 216,209 scripts out of an estimated counterfactual of 1,188,210 scripts, yielding an **18% estimated decrease** in branded scripts.

**Table A14: Splitting Effects by Volume Quintiles, DV = Rx, Dropping Rare Doctor-Drugs**

|                                 | (A36)                | (A37)                 | (A38)                 | (A39)                 | (A40)             |
|---------------------------------|----------------------|-----------------------|-----------------------|-----------------------|-------------------|
| <b>N (physician-drug-month)</b> | <b>668,273</b>       | <b>217,813</b>        | <b>94,609</b>         | <b>40,617</b>         | <b>13,485</b>     |
| <b>Volume Quintile</b>          | <b>Top</b>           | <b>2<sup>nd</sup></b> | <b>3<sup>rd</sup></b> | <b>4<sup>th</sup></b> | <b>Bottom</b>     |
| <b>Dependent Variable</b>       | <b>Rx</b>            | <b>Rx</b>             | <b>Rx</b>             | <b>Rx</b>             | <b>Rx</b>         |
| <b>Adj-R<sup>2</sup></b>        | <b>0.860</b>         | <b>0.478</b>          | <b>0.280</b>          | <b>0.089</b>          | <b>0.014</b>      |
| <i>Main Effects</i>             |                      |                       |                       |                       |                   |
| 1. Sunshine Implementation      | -0.343<br>(0.403)    | 0.432<br>(0.327)      | -0.193<br>(0.184)     | -0.052<br>(0.173)     | 0.075<br>(0.169)  |
| <i>Interactions</i>             |                      |                       |                       |                       |                   |
| 2. Sunshine*Branded             | -1.750***<br>(0.301) | -1.462***<br>(0.148)  | -0.258<br>(0.329)     | -0.055<br>(0.135)     | -0.019<br>(0.110) |
| Month FE                        | YES                  | YES                   | YES                   | YES                   | YES               |
| Physician*Drug FE               | YES                  | YES                   | YES                   | YES                   | YES               |
| <i>Linear Comb. of Coeff.</i>   |                      |                       |                       |                       |                   |
| a.) 1 + 2                       | -2.093***<br>(0.477) | -1.029**<br>(0.385)   | -0.450<br>(0.369)     | -0.107<br>(0.212)     | 0.056<br>(0.184)  |

\*\*\* p<0.01. SEs are robust and clustered by AMC.

The *Branded* indicator is dropped for being collinear to drug FE.

Linear combination (a) represents the net effect of *sunshine-implementation* on *branded drugs*.

**Table A14b: Summary Stats for Table A14**

| <b>Volume Quintile</b>                              | <b>Top</b>        | <b>2<sup>nd</sup></b> | <b>3<sup>rd</sup></b> | <b>4<sup>th</sup></b> | <b>Bottom</b>    |
|-----------------------------------------------------|-------------------|-----------------------|-----------------------|-----------------------|------------------|
| Total physicians                                    | 1000              | 1000                  | 1000                  | 1000                  | 1001             |
| Total branded scripts in MA,<br>post-policy average | 8.984<br>(11.058) | 4.850<br>(4.979)      | 3.426<br>(3.497)      | 2.345<br>(2.560)      | 1.481<br>(1.657) |
| Obs, MA post-policy                                 | 64,878            | 20,567                | 8,166                 | 3,081                 | 807              |
| Extrapolated effect size                            | 18.9%             | 17.5%                 | 11.6%                 | 4.4%                  | 3.6%             |
| Extrapolated scripts reduced                        | 135,790           | 21,163                | 3,675                 | 330                   | 45               |

This extrapolates to an estimated decrease of 161,003 scripts out of an estimated counterfactual of 880,014 scripts, yielding an **18% estimated decrease** in branded scripts.

**Table A15: Splitting Effects by Volume Quintiles, DV = Log(Rx+1), Dropping Rare Doctor-Drugs**

|                                 | (A41)               | (A42)                 | (A43)                 | (A44)                 | (A45)             |
|---------------------------------|---------------------|-----------------------|-----------------------|-----------------------|-------------------|
| <b>N (physician-drug-month)</b> | <b>668,273</b>      | <b>217,813</b>        | <b>94,609</b>         | <b>40,617</b>         | <b>13,485</b>     |
| <b>Volume Quintile</b>          | <b>Top</b>          | <b>2<sup>nd</sup></b> | <b>3<sup>rd</sup></b> | <b>4<sup>th</sup></b> | <b>Bottom</b>     |
| <b>Dependent Variable</b>       | <b>Log(Rx+1)</b>    | <b>Log(Rx+1)</b>      | <b>Log(Rx+1)</b>      | <b>Log(Rx+1)</b>      | <b>Log(Rx+1)</b>  |
| <b>Adj-R<sup>2</sup></b>        | <b>0.698</b>        | <b>0.410</b>          | <b>0.269</b>          | <b>0.111</b>          | <b>0.019</b>      |
| <i>Main Effects</i>             |                     |                       |                       |                       |                   |
| 1. Sunshine Implementation      | -0.063<br>(0.046)   | 0.356<br>(0.073)      | -0.101**<br>(0.046)   | -0.015<br>(0.052)     | 0.030<br>(0.063)  |
| <i>Interactions</i>             |                     |                       |                       |                       |                   |
| 2. Sunshine*Branded             | -0.060**<br>(0.026) | -0.192***<br>(0.039)  | -0.033<br>(0.071)     | -0.025<br>(0.038)     | -0.011<br>(0.044) |
| Month FE                        | YES                 | YES                   | YES                   | YES                   | YES               |
| Physician*Drug FE               | YES                 | YES                   | YES                   | YES                   | YES               |
| <i>Linear Comb. of Coeff.</i>   |                     |                       |                       |                       |                   |
| a.) 1 + 2                       | -0.123**<br>(0.053) | -0.156*<br>(0.083)    | -0.113<br>(0.084)     | -0.039<br>(0.064)     | 0.019<br>(0.074)  |

\*\*\* p<0.01. SEs are robust and clustered by AMC.

The *Branded* indicator is dropped for being collinear to drug FE.

Linear combination (a) represents the net effect of *sunshine-implementation* on *branded drugs*.

**Table A15b: Summary Stats for Table A15**

| <b>Volume Quintile</b>                                | <b>Top</b>       | <b>2<sup>nd</sup></b> | <b>3<sup>rd</sup></b> | <b>4<sup>th</sup></b> | <b>Bottom</b>    |
|-------------------------------------------------------|------------------|-----------------------|-----------------------|-----------------------|------------------|
| Total physicians                                      | 1000             | 1000                  | 1000                  | 1000                  | 1001             |
| Total log(branded) scripts in MA, post-policy average | 1.859<br>(0.946) | 1.454<br>(0.815)      | 1.203<br>(0.774)      | 0.966<br>(0.695)      | 0.722<br>(0.602) |
| Obs, MA post-policy                                   | 64,878           | 20,567                | 8,166                 | 3,081                 | 807              |

Many academic medical centers began imposing AMC-level policies on industry marketing during the 2000s and 2010s. Table A17 lists policy implementations (if any) for the AMCs in this study, provided by the Institute for Medicine as a Profession. Model (A46) controls for these policies and demonstrates that disclosure effects are robust to controlling for AMC-level policies. The effect of AMC policies is positive and significant for generics, while the net effect on branded drugs is negative, suggesting a substitution story. This is consistent with previous literature, which showed similar substitution patterns for AMC policies, and also found that AMC policy effects were significant for only approximately half of AMCs, depending on AMC policy details (Larkin et al. 2017).

**Table A16: Controlling for Other AMC Marketing Policies**

|                                            | (A46)                |
|--------------------------------------------|----------------------|
| <b>N (physician-drug-month)</b>            | <b>15,317,968</b>    |
| <b>Adj. R<sup>2</sup></b>                  | <b>0.877</b>         |
| <i>Policies</i>                            |                      |
| 1. Sunshine                                | 0.016<br>(0.034)     |
| 2. AMC-Policy                              | 0.033**<br>(.015)    |
| <i>Interactions</i>                        |                      |
| 3. Sunshine*Branded                        | -0.145***<br>(0.033) |
| 4. AMC*Branded                             | -0.068***<br>(0.014) |
| <i>Controls</i>                            |                      |
| Month FE                                   | YES                  |
| Physician*Drug FE                          | YES                  |
| <i>Linear combinations of coefficients</i> |                      |
| a.) 1 + 3 (sunshine law)                   | -0.129***<br>(0.043) |
| b.) 2 + 4 (AMC policy)                     | -0.035*<br>(0.020)   |

\*p<0.10, \*\*p<0.05, \*\*\*p<0.01. SEs are robust and clustered by AMC.

a) Net effect of the sunshine law on marketed drugs.

b) Net effect of AMC policies on marketed drugs.

Observations are slightly fewer as some physicians could be identified at a state level but not a specific AMC. These were clustered together by state before but excluded here.

**Table A17: List of AMCs and AMC Policy Dates**

| AMC Affiliations                         | Marketing Policy Date |
|------------------------------------------|-----------------------|
| University of California - Davis         | Jul-07                |
| University of California - San Francisco | Jul-07                |
| University of Illinois - Chicago         | Dec-07                |
| Mount Sinai University                   | Jan-08                |
| University of Southern California        | Jan-08                |
| University of Pittsburgh                 | Feb-08                |
| University of California - San Diego     | Mar-08                |
| University of Rochester                  | Jun-08                |
| University of Massachusetts              | Jul-08                |
| Rush University                          | Jan-09                |
| Stonybrook University                    | Mar-09                |
| Rosalind Franklin University             | Jun-09                |
| Temple University                        | Jun-09                |
| Harvard University                       | Oct-09                |
| University of California - Los Angeles   | Oct-09                |
| New York Medical College                 | Jan-10                |
| Northwestern University                  | Jan-10                |
| SUNY Downstate                           | Apr-10                |
| Tufts University                         | Apr-10                |
| Stanford University                      | Jul-10                |
| Boston University                        | Aug-10                |
| Thomas Jefferson University              | May-11                |
| New York College of Medicine             | None                  |

**Table A18: Summary Statistics, Only Drugs Present in All 48 Months**

|                               | <b>Total Observations<br/>(physician-drug-month)</b> | <b>Jul07 – Jun09<br/>(pre-law)</b> | <b>Total Observations<br/>(physician-drug-month)</b> | <b>Jul09 – Jul11<br/>(post-law)</b> |
|-------------------------------|------------------------------------------------------|------------------------------------|------------------------------------------------------|-------------------------------------|
| Branded Rx,<br>Massachusetts  | 875,736<br>(83% zeroes)                              | 1.01<br>(4.58)                     | 875,736<br>(81% zeroes)                              | 0.94<br>(3.81)                      |
| Branded Rx,<br>Control States | 830,496<br>(85% zeroes)                              | 0.85<br>(4.36)                     | 830,496<br>(83% zeroes)                              | 0.91<br>(4.33)                      |
| Generic Rx,<br>Massachusetts  | 1,348,320<br>(74% zeroes)                            | 1.66<br>(6.25)                     | 1,348,320<br>(73% zeroes)                            | 1.81<br>(6.64)                      |
| Generic Rx,<br>Control States | 1,250,112<br>(81% zeroes)                            | 0.94<br>(4.66)                     | 1,250,112<br>(79% zeroes)                            | 1.11<br>(5.11)                      |

**Table A19: Summary Statistics, Non-Zero Observations Only**

|                               | <b>Total<br/>Observations</b> | <b>Mean<br/>(SD)</b> | <b>Range<br/>(min to max)</b> | <b>Total<br/>Observations</b> | <b>Mean<br/>(SD)</b> | <b>Range<br/>(min to max)</b> |
|-------------------------------|-------------------------------|----------------------|-------------------------------|-------------------------------|----------------------|-------------------------------|
| Branded Rx,<br>Massachusetts  | 177,684                       | 5.55<br>(9.27)       | 0.26 to<br>201.47             | 199,631                       | 4.87<br>(7.36)       | 0.35 to<br>156.08             |
| Branded Rx,<br>Control States | 370,176                       | 6.20<br>(10.71)      | 0.31 to<br>284.28             | 413,330                       | 6.642<br>(10.92)     | 0.3 to<br>371.65              |
| Generic Rx,<br>Massachusetts  | 148,141                       | 5.42<br>(9.50)       | 0.46 to<br>423.29             | 173,076                       | 5.18<br>(8.86)       | 0.36 to<br>387.67             |
| Generic Rx,<br>Control States | 253,511                       | 4.82<br>(9.46)       | 0.43 to<br>404.15             | 287,728                       | 5.18<br>(9.85)       | 0.41 to<br>349.49             |

**Table A20: Summary Statistics, Dropping Rare Doctor-Drug Pairs**

|                               | <b>Total<br/>Observations</b> | <b>Mean<br/>(SD)</b> | <b>Range<br/>(min to max)</b> | <b>Total<br/>Observations</b> | <b>Mean<br/>(SD)</b> | <b>Range<br/>(min to max)</b> |
|-------------------------------|-------------------------------|----------------------|-------------------------------|-------------------------------|----------------------|-------------------------------|
| Branded Rx,<br>Massachusetts  | 96,962                        | 7.90<br>(11.84)      | 0 to<br>201.47                | 97,499                        | 7.37<br>(9.66)       | 0 to<br>156.08                |
| Branded Rx,<br>Control States | 200,040                       | 9.27<br>(13.66)      | 0 to<br>284.28                | 210,089                       | 10.15<br>(14.12)     | 0 to<br>371.65                |
| Generic Rx,<br>Massachusetts  | 84,151                        | 7.21<br>(12.12)      | 0 to<br>423.29                | 85,269                        | 7.76<br>(11.83)      | 0 to<br>387.67                |
| Generic Rx,<br>Control States | 128,409                       | 6.86<br>(12.79)      | 0 to<br>404.15                | 132,378                       | 8.24<br>(13.67)      | 0 to<br>349.49                |

**Table A21: Splitting by Both Prescribing Volume and Sales Force**

|                                                           | (A47)                |
|-----------------------------------------------------------|----------------------|
| <b>DV</b>                                                 | <b>Rx</b>            |
| <b>Pre-Policy Split Based On</b>                          | <b>Total Rx</b>      |
| <b>N (physician-drug-month)</b>                           | <b>17,013,810</b>    |
| <b>Adj-R<sup>2</sup></b>                                  | <b>0.874</b>         |
| <i>Policy * Half</i>                                      |                      |
| 1. Sunshine Implementation * High Volume Half             | 0.027<br>(0.041)     |
| 2. Sunshine Implementation * Low Volume Half              | 0.086*<br>(0.043)    |
| <i>Policy * Half * Branded</i>                            |                      |
| 3. Sunshine * High * Branded                              | -0.107**<br>(0.048)  |
| 4. Sunshine * Low * Branded                               | -0.137***<br>(0.039) |
| <i>Policy * Half * Any Sales Force</i>                    |                      |
| 5. Sunshine * High * Any Sales Force                      | -0.202**<br>(0.076)  |
| 6. Sunshine * Low * Any Sales Force                       | 0.133***<br>(0.030)  |
| <i>Controls</i>                                           |                      |
| Month FE                                                  | YES                  |
| Physician*Drug FE                                         | YES                  |
| <i>Linear Combinations of Coefficients</i>                |                      |
| a.) 1 + 3 (High volume, branded but no sales force)       | -0.080<br>(0.053)    |
| b.) 2+ 4 (Low volume, branded but no sales force)         | -0.051<br>(0.030)    |
| c.) 1 + 3 + 5 + 7 (High volume, branded with sales force) | -0.282***<br>(0.068) |
| d.) 2+ 4 + 6 + 8 (Low volume, branded with sales force)   | 0.082*<br>(0.047)    |

\*p<0.10, \*\*p<0.05, \*\*\*p<0.01.

SEs are robust and clustered by AMC.

For comparison, average branded Rx in MA, post-policy, was 0.177 (top, no sales force), 0.083 (bottom, no sales force), 1.465 (top, sales force), and 0.341 (bottom, no sales force).

**Table A22: List of Drugs, with Drug Class**

|                    |                |                    |                  |
|--------------------|----------------|--------------------|------------------|
| AMITRIPTYLINE HCL  | Antidepressant | VIVACTIL           | Antidepressant   |
| AMOXAPINE          | Antidepressant | WELLBUTRIN         | Antidepressant   |
| ANAFRANIL          | Antidepressant | WELLBUTRIN SR      | Antidepressant   |
| APLENZIN           | Antidepressant | ADDERALL           | Antihyperactives |
| BUDEPRION SR       | Antidepressant | AMPHETAMIN SALT ER | Antihyperactives |
| BUPROPION HCL      | Antidepressant | AMPHETAMINE SALTS  | Antihyperactives |
| BUPROPION HCL SR   | Antidepressant | CONCERTA           | Antihyperactives |
| BUPROPION HCL SR W | Antidepressant | DAYTRANA           | Antihyperactives |
| CELEXA             | Antidepressant | DEXEDRINE          | Antihyperactives |
| CITALOPRAM HBR     | Antidepressant | DEXMETHYLPHEN HCL  | Antihyperactives |
| CLOMIPRAMINE HCL   | Antidepressant | DEXTROAMPHETAMINE  | Antihyperactives |
| CYMBALTA           | Antidepressant | DEXTROSTAT         | Antihyperactives |
| DESIPRAMINE HCL    | Antidepressant | FOCALIN XR         | Antihyperactives |
| DESYREL            | Antidepressant | KAPVAY             | Antihyperactives |
| DOXEPIN HCL        | Antidepressant | LIQUADD            | Antihyperactives |
| ELAVIL             | Antidepressant | METADATE ER        | Antihyperactives |
| FLUOXETINE HCL     | Antidepressant | METHYLIN ER        | Antihyperactives |
| FLUVOXAMINE MAL    | Antidepressant | METHYLPHENIDATE    | Antihyperactives |
| IMIPRAMINE HCL     | Antidepressant | PROCENTRA          | Antihyperactives |
| IMIPRAMINE PAM     | Antidepressant | RITALIN            | Antihyperactives |
| LEXAPRO            | Antidepressant | RITALIN-SR         | Antihyperactives |
| LUVOX CR           | Antidepressant | STRATTERA          | Antihyperactives |
| MAPROTILINE HCL    | Antidepressant | VYVANSE            | Antihyperactives |
| MIRTAZAPINE        | Antidepressant | ADVICOR            | Statins          |
| NEFAZODONE HCL     | Antidepressant | ALTOPREV           | Statins          |
| NORPRAMIN          | Antidepressant | CADUET             | Statins          |
| NORTRIPTYLINE HCL  | Antidepressant | CRESTOR            | Statins          |
| OLEPTRO            | Antidepressant | LESCOL             | Statins          |
| PAMELOR            | Antidepressant | LESCOL XL          | Statins          |
| PAROXETINE HCL     | Antidepressant | LIPITOR            | Statins          |
| PAXIL              | Antidepressant | LIVALO             | Statins          |
| PAXIL CR           | Antidepressant | LOVASTATIN         | Statins          |
| PEXEVA             | Antidepressant | MEVACOR            | Statins          |
| PRISTIQ            | Antidepressant | SIMCOR             | Statins          |
| PROTRIPTYLINE HCL  | Antidepressant | VYTORIN            | Statins          |
| PROZAC             | Antidepressant | ABILIFY            | Antipsychotics   |
| PROZAC WEEKLY      | Antidepressant | CHLORPROMAZINE HCL | Antipsychotics   |
| REMERON            | Antidepressant | CLOZAPINE          | Antipsychotics   |
| REMERON SOLTAB     | Antidepressant | CLOZARIL           | Antipsychotics   |
| SELFEMRA           | Antidepressant | DIASTAT            | Antipsychotics   |
| SINEQUAN           | Antidepressant | DIASTAT ACUDIAL    | Antipsychotics   |
| SURMONTIL          | Antidepressant | EQUETRO            | Antipsychotics   |
| TOFRANIL           | Antidepressant | FANAPT             | Antipsychotics   |
| TRAZODONE HCL      | Antidepressant | FAZACLO            | Antipsychotics   |

|                    |                |                   |            |
|--------------------|----------------|-------------------|------------|
| FLUPHENAZINE DECAN | Antipsychotics | DOXYLAMINE SUCCIN | Sleep Aids |
| FLUPHENAZINE HCL   | Antipsychotics | EDLUAR            | Sleep Aids |
| HALDOL DECANOATE   | Antipsychotics | ESTAZOLAM         | Sleep Aids |
| HALOPERIDOL        | Antipsychotics | FLURAZEPAM HCL    | Sleep Aids |
| HALOPERIDOL DECAN  | Antipsychotics | HALCION           | Sleep Aids |
| HALOPERIDOL LACT   | Antipsychotics | LUNESTA           | Sleep Aids |
| INVEGA             | Antipsychotics | MIDAZOLAM HCL     | Sleep Aids |
| INVEGA SUSTENNA    | Antipsychotics | NUVIGIL           | Sleep Aids |
| LATUDA             | Antipsychotics | RESTORIL          | Sleep Aids |
| LOXAPINE           | Antipsychotics | SILENOR           | Sleep Aids |
| LOXITANE           | Antipsychotics | TEMAZEPAM         | Sleep Aids |
| MOBAN              | Antipsychotics | TRIAZOLAM         | Sleep Aids |
| NAVANE             | Antipsychotics | ACTOPLUS MET XR   | Diabetes   |
| ORAP               | Antipsychotics | AMARYL            | Diabetes   |
| PERPHENAZINE       | Antipsychotics | AVANDAMET         | Diabetes   |
| RISPERDAL CONSTA   | Antipsychotics | AVANDARYL         | Diabetes   |
| RISPERIDONE ODT    | Antipsychotics | AVANDIA           | Diabetes   |
| SAPHRIS            | Antipsychotics | BYETTA            | Diabetes   |
| SEROQUEL           | Antipsychotics | CHLORPROPAMIDE    | Diabetes   |
| SEROQUEL XR        | Antipsychotics | DIABETA           | Diabetes   |
| THIORIDAZINE HCL   | Antipsychotics | DUETACT           | Diabetes   |
| THIOTHIXENE        | Antipsychotics | GLIMEPIRIDE       | Diabetes   |
| TRIFLUOPERAZIN HCL | Antipsychotics | GLIPIZIDE         | Diabetes   |
| ZYPREXA            | Antipsychotics | GLIPIZIDE ER      | Diabetes   |
| ZYPREXA IM         | Antipsychotics | GLIPIZIDE/METFORM | Diabetes   |
| ZYPREXA RELPREVV   | Antipsychotics | GLUCOPHAGE        | Diabetes   |
| ZYPREXA ZYDIS      | Antipsychotics | GLUCOPHAGE XR     | Diabetes   |
| ALPRAZOLAM         | Anxiolytics    | GLUCOTROL         | Diabetes   |
| ATARAX             | Anxiolytics    | GLUCOVANCE        | Diabetes   |
| ATIVAN             | Anxiolytics    | GLUMETZA          | Diabetes   |
| BUSPAR             | Anxiolytics    | GLYBURIDE         | Diabetes   |
| BUSPIRONE HCL      | Anxiolytics    | GLYBURIDE MICRO   | Diabetes   |
| CHLORDIAZEPOX HCL  | Anxiolytics    | GLYBURIDE/METFORM | Diabetes   |
| CLORAZEPATE DIPOT  | Anxiolytics    | GLYNASE PRESTAB   | Diabetes   |
| DIAZEPAM           | Anxiolytics    | GLYSET            | Diabetes   |
| HYDROXYZINE HCL    | Anxiolytics    | JANUMET           | Diabetes   |
| HYDROXYZINE PAM    | Anxiolytics    | JANUVIA           | Diabetes   |
| LIBRIUM            | Anxiolytics    | KOMBIGLYZE XR     | Diabetes   |
| LORAZEPAM          | Anxiolytics    | LANTUS            | Diabetes   |
| LORAZEPAM INTENSOL | Anxiolytics    | LANTUS SOLOSTAR   | Diabetes   |
| MEPROBAMATE        | Anxiolytics    | LEVEMIR           | Diabetes   |
| NIRAVAM            | Anxiolytics    | METAGLIP          | Diabetes   |
| OXAZEPAM           | Anxiolytics    | METFORMIN ER (G)  | Diabetes   |
| TRANXENE T-TAB     | Anxiolytics    | METFORMIN HCL     | Diabetes   |
| VALIUM             | Anxiolytics    | METFORMIN HCL ER  | Diabetes   |
| VISTARIL           | Anxiolytics    | MICRONASE         | Diabetes   |
| XANAX              | Anxiolytics    | ONGLYZA           | Diabetes   |
| DORAL              | Sleep Aids     | PRANDIN           | Diabetes   |

|                  |                        |                    |                   |
|------------------|------------------------|--------------------|-------------------|
| RIOMET           | Diabetes               | ENALAPRIL MAL/HCTZ | Antihypertensives |
| SYMLIN           | Diabetes               | EXFORGE            | Antihypertensives |
| SYMLINPEN 120    | Diabetes               | EXFORGE HCT        | Antihypertensives |
| SYMLINPEN 60     | Diabetes               | FOSINOPRIL SOD     | Antihypertensives |
| TOLAZAMIDE       | Diabetes               | FOSINOPRIL/HCTZ    | Antihypertensives |
| TOLBUTAMIDE      | Diabetes               | INDERAL            | Antihypertensives |
| TRADJENTA        | Diabetes               | LISINOPRIL         | Antihypertensives |
| VICTOZA 2-PAK    | Diabetes               | LISINOPRIL/HCTZ    | Antihypertensives |
| VICTOZA 3-PAK    | Diabetes               | LOPRESSOR          | Antihypertensives |
| ACIPHEX          | Proton Pump Inhibitors | LOTENSIN           | Antihypertensives |
| DEXILANT         | Proton Pump Inhibitors | LOTENSIN HCT       | Antihypertensives |
| KAPIDEX          | Proton Pump Inhibitors | MAVIK              | Antihypertensives |
| NEXIUM           | Proton Pump Inhibitors | METOPROLOL TART    | Antihypertensives |
| OMEPRazole (RX)  | Proton Pump Inhibitors | MICARDIS           | Antihypertensives |
| PREVACID SOLUTAB | Proton Pump Inhibitors | MICARDIS HCT       | Antihypertensives |
| PRIOSEC          | Proton Pump Inhibitors | MONOPRIL           | Antihypertensives |
| ZEGERID (OTC)    | Proton Pump Inhibitors | MONOPRIL HCT       | Antihypertensives |
| ACCUPRIL         | Antihypertensives      | NADOLOL            | Antihypertensives |
| ACCURETIC        | Antihypertensives      | PINDOLOL           | Antihypertensives |
| ACEBUTOLOL HCL   | Antihypertensives      | PRINIVIL           | Antihypertensives |
| ALTACE           | Antihypertensives      | PRINZIDE           | Antihypertensives |
| ATACAND          | Antihypertensives      | PROPRANOLOL HCL    | Antihypertensives |
| ATACAND HCT      | Antihypertensives      | QUINAPRIL HCL      | Antihypertensives |
| ATENOLOL         | Antihypertensives      | QUINARETIC         | Antihypertensives |
| AVAPRO           | Antihypertensives      | SECTRAL            | Antihypertensives |
| AZOR             | Antihypertensives      | TENORMIN           | Antihypertensives |
| BENAZEPRIL HCL   | Antihypertensives      | TEVETEN            | Antihypertensives |
| BENAZEPRIL/HCTZ  | Antihypertensives      | TEVETEN HCT        | Antihypertensives |
| BENICAR          | Antihypertensives      | TIMOLOL MAL        | Antihypertensives |
| BENICAR HCT      | Antihypertensives      | TRANDOLAPRIL       | Antihypertensives |
| BISOPROLOL FUM   | Antihypertensives      | TRIBENZOR          | Antihypertensives |
| CAPOTEN          | Antihypertensives      | TWYNSTA            | Antihypertensives |
| CAPTOPRIL        | Antihypertensives      | UNIVASC            | Antihypertensives |
| CAPTOPRIL/HCTZ   | Antihypertensives      | VALTURNA           | Antihypertensives |
| CORGARD          | Antihypertensives      | VASERETIC          | Antihypertensives |
| DIOVAN           | Antihypertensives      | VASOTEC            | Antihypertensives |
| DIOVAN HCT       | Antihypertensives      | ZEBETA             | Antihypertensives |
| EDARBI           | Antihypertensives      | ZESTORETIC         | Antihypertensives |
| ENALAPRIL MAL    | Antihypertensives      | ZESTRIL            | Antihypertensives |
